# Supplementary material for: An epitope encoded by uORF of RNF10 elicits a therapeutic anti-tumor immune response
Source: PubMed Central journal article supplement — Mol Ther Oncolytics. 2023 Oct 19;31:100737. doi: 10.1016/j.omto.2023.100737 (PMC10654591; doi:10.1016/j.omto.2023.100737), 2023-10-19
Supplement: mmc1.pdf [file mmc1.pdf]

OMTO, Volume 31

## Supplemental information

**An epitope encoded by uORF  
of *RNF10* elicits a therapeutic  
anti-tumor immune response**

**Lili Zeng, Wei Zheng, Jiahui Zhang, Jiawen Wang, Qing Ji, Xinglong Wu, Yaming Meng, and Xiaofeng Zhu**

**Table S1.** Primers used in the qRT-PCR for indicated genes.

| Gene name        | Sequence                                                                       |
|------------------|--------------------------------------------------------------------------------|
| <i>mmu-RNF10</i> | 5'-CCGGCGAGTCTAAACCCAAG-3'(forward)<br>5'-CGACGGGACTGGTTGCTAAAA-3'(reverse)    |
| <i>mmu-ACTB</i>  | 5'-GGCTGTATTCCCCTCCATCG-3'(forward)<br>5'-CCAGTTGGTAACAATGCCATGT-3'(reverse)   |
| <i>hsa-RNF10</i> | 5'-AAGGAACTCTTTTTACAGGCCAA-3'(forward)<br>5'-AGATGGCACTTCATGGCTACA-3'(reverse) |
| <i>hsa-ACTB</i>  | 5'-GATGCGTTGTTACAGGAAGTCC-3'(forward)<br>5'-GGCACGAAGGCTCATCATTCA-3'(reverse)  |

**Table S2.** Information of patients whose peripheral blood were used for RNF10 uPeptide immunogenic assays.

| Patients ID | Age | Histology grade | sex    | Tumor size (mm) |
|-------------|-----|-----------------|--------|-----------------|
| SYM201      | 38  | II              | man    | 43*36           |
| SYM202      | 51  | III             | female | 41*27           |
| SYM203      | 46  | III             | man    | 37*22           |

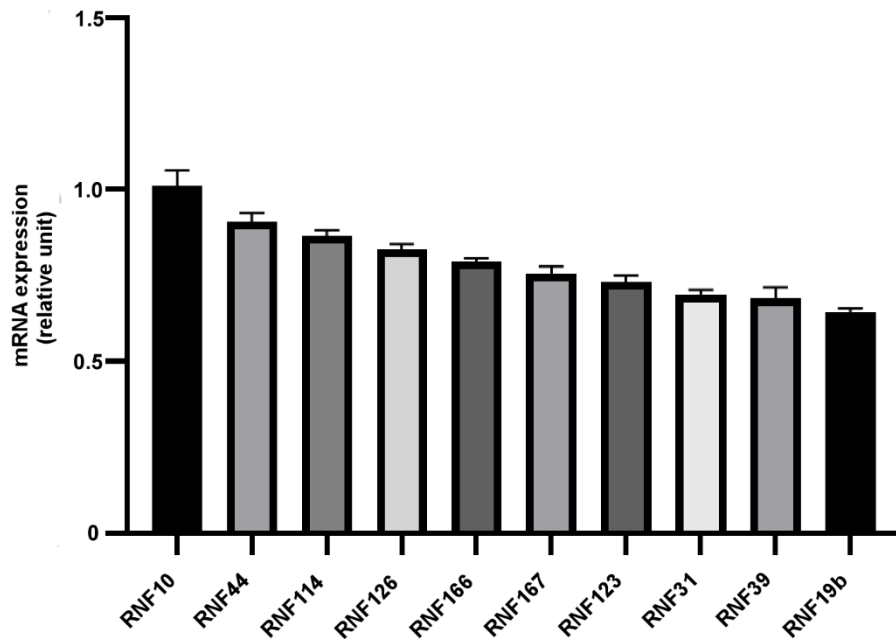

**Figure S1.** *RNFs* mRNA levels in CT26 cells were detected by qRT-PCR.

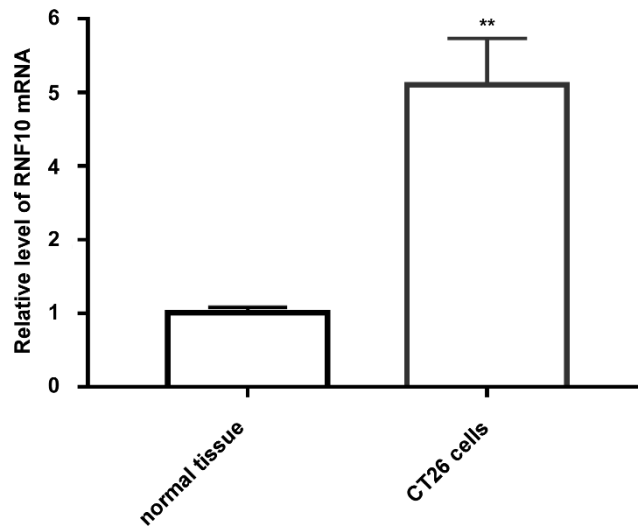

**Figure S2.** *RNF10* mRNA levels in CT26 cells (n=3) and normal colon tissues (n=3) of BALB/c were detected by q-PCR. \* $P < 0.05$ , \*\* $P < 0.01$ , \*\*\* $P < 0.001$ , CT26 cells compared with normal tissue.

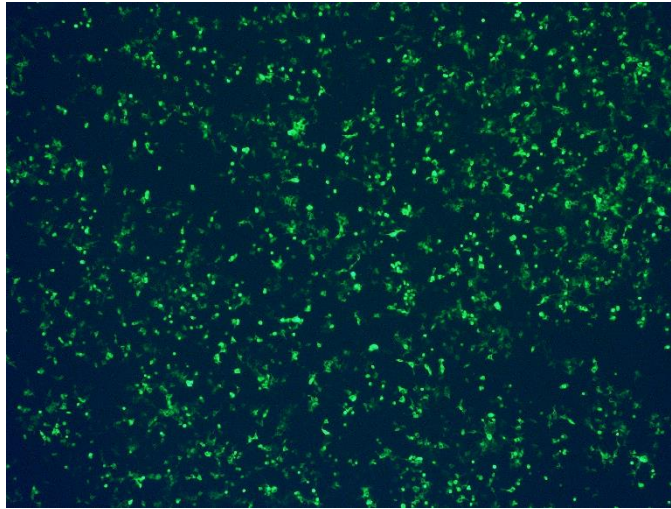

**Figure S3.** Representative pictures of EGFP-tagged uORF vector was detected 24 h after transfection of HEK293T cells.

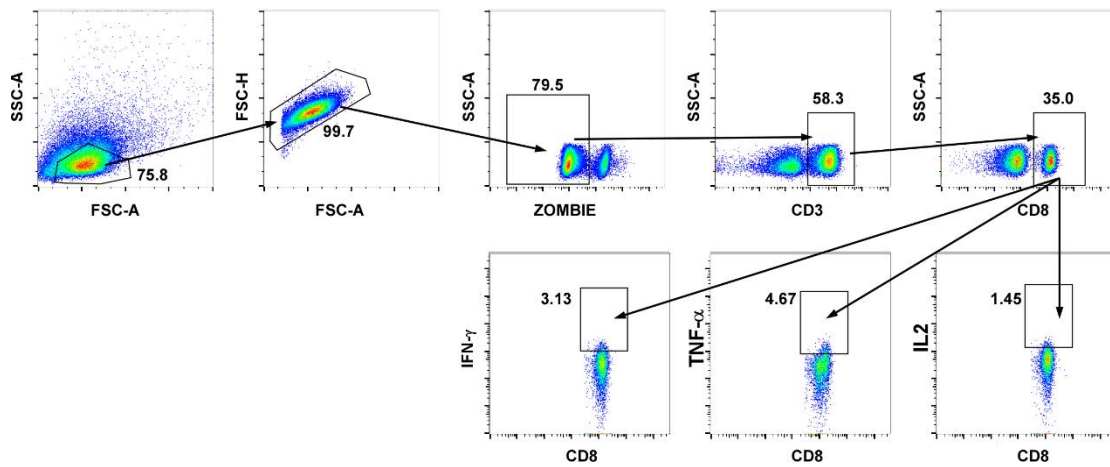

**Figure S4.** The gating strategy for CD8+ T cells used to determine these gates of IFN- $\gamma$  +, TNF- $\alpha$  or IL2+ CD8+ T cells.

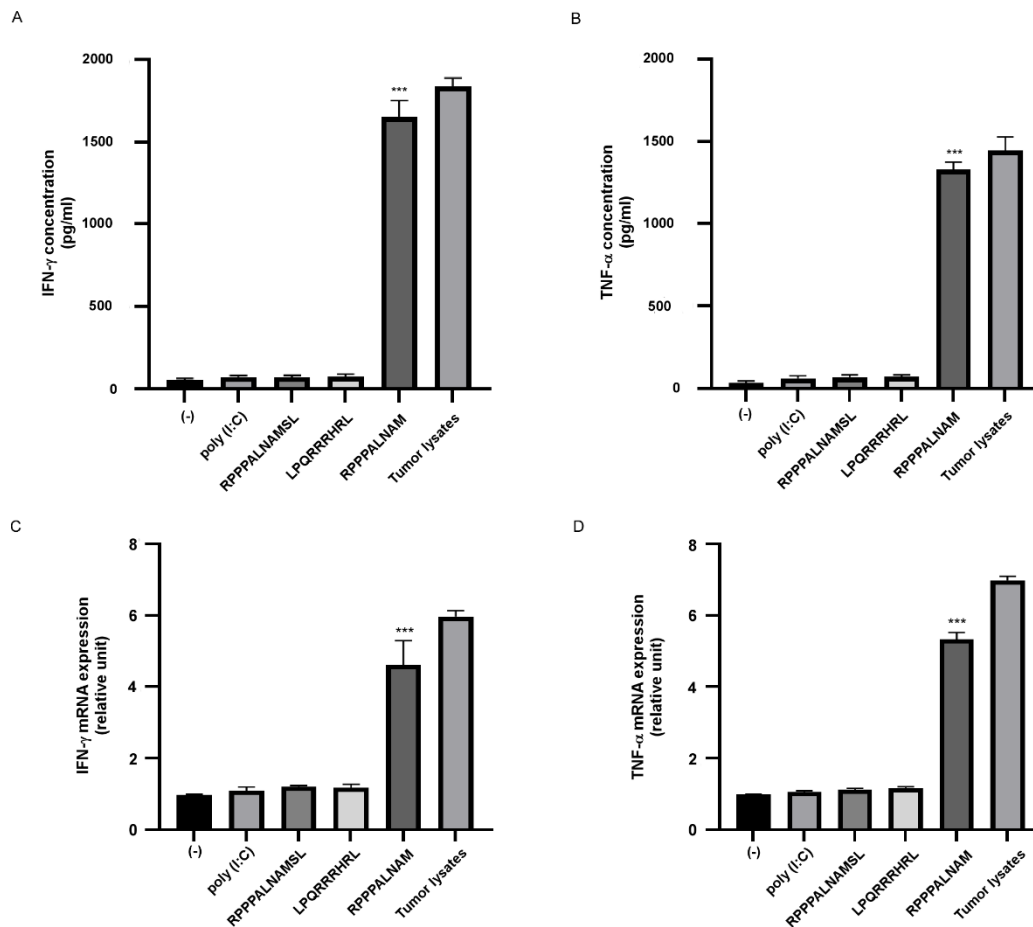

**Figure S5.** A, B. Splenocytes of vaccinated mice were restimulated with the RNF10 uPeptide antigens used for vaccination. The production of IFN- $\gamma$  and TNF- $\alpha$  of splenocytes to the RNF10 uPeptide was assessed by ELISA.

C, D. Splenocytes of mice injected with CT26 cells and vaccinated with peptides and the polyinosinic:polycytidylic acid (poly[I:C]) adjuvant (CT26, n = 3) were tested for the production of cytokine by qRT-PCR.

\*P < 0.05, \*\*P < 0.01, \*\*\*P < 0.001 compared with untreated T cells (-). P-values were determined by two-tailed one-way ANOVA with Dunnett's multiple-comparisons test.

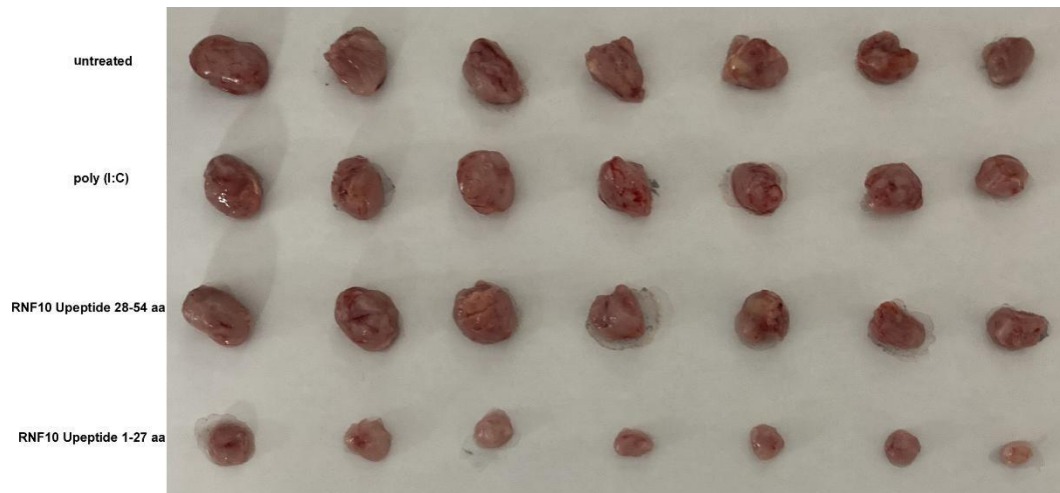

**Figure S6.** Images of subcutaneous tumors in each group.

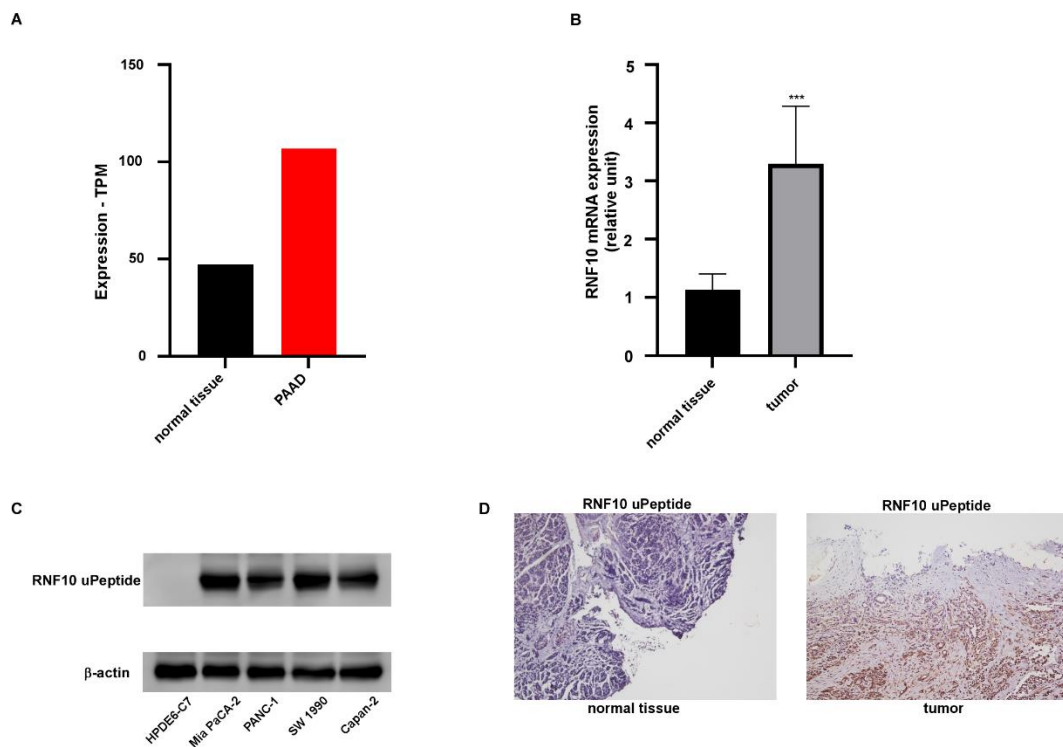

**Figure S7.** Human RNF10 uPeptide overexpressed in PAAD. A. The expression of *RNF10* mRNA in GEPIA 2. B. The expression of *RNF10* mRNA in PAAD tissue and normal tissue tested by qRT-PCR. C. The expression of RNF10 uPeptide was detected in benign HPDE6-C7 cells and malignant MIA PaCa-2 cells, PANC-1 cells, SW1990 cells and Capan-2 cells by immunoblotting. D. The expression of RNF10 uPeptide was assessed in PAAD tissue and normal tissue by IHC.

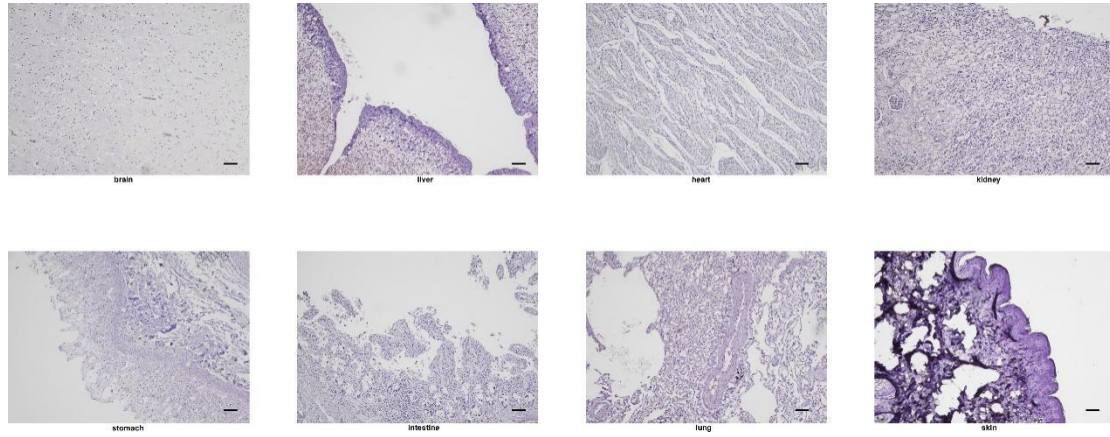

**Figure S8.** The expression of RNF10 uPeptide was assessed in some vital organs by IHC.

| allele      | peptide     | rank |
|-------------|-------------|------|
| HLA-A*02:01 | RLFGQQQRA   | 0.2  |
| HLA-A*02:01 | RLFGQQQRATA | 0.71 |
| HLA-A*02:01 | RLGGASRRV   | 1.1  |
| HLA-A*02:01 | LRLFGQQQRA  | 1.8  |
| HLA-A*02:01 | LLRLFGQQQRA | 2    |

**Figure S9.** The binding predictions for RNF10 uPeptides to HLA-A2 using the Immune Epitope Database (version 2.5) analysis resource NetMHCpan (ver. 4.1) algorithm.

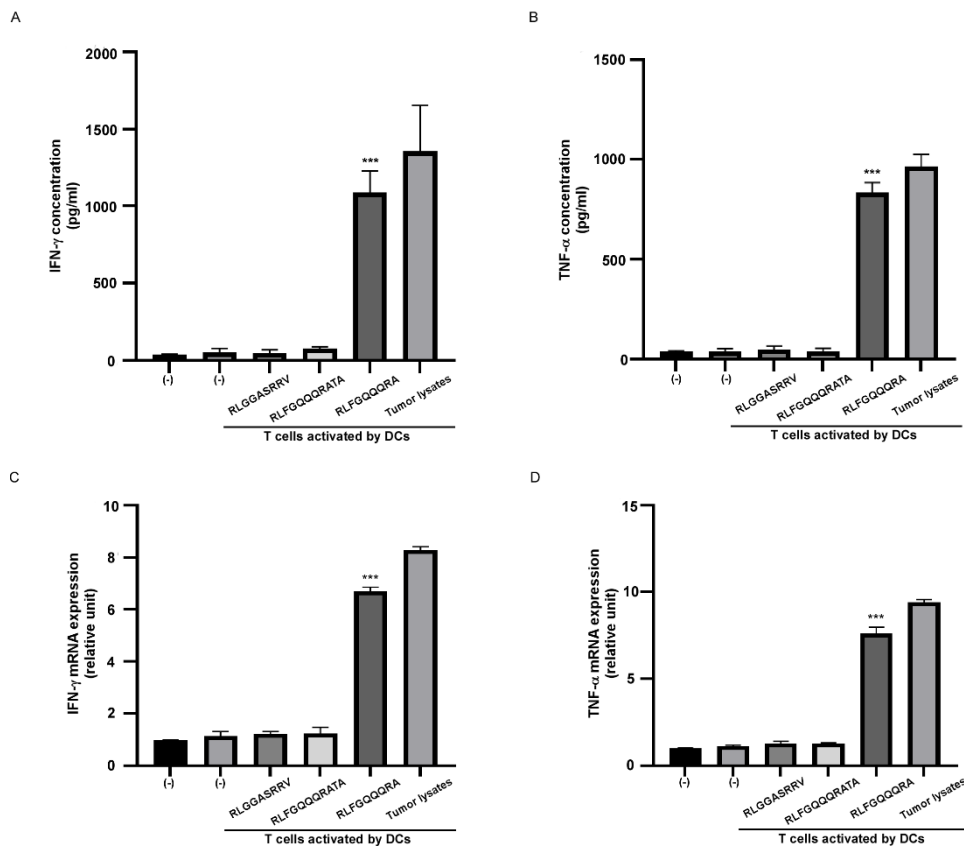

**Figure S10.** RNF10 uPeptide elicits human T cell immune response.

A, B. T cells were primed by autologous DCs loaded with uPeptide antigens. The production of IFN- $\gamma$  and TNF- $\alpha$  of T cells to the RNF10 uPeptide was assessed by ELISA. C, D. The primed T cells were re-stimulated with uPeptide antigens overnight and evaluated by qRT-PCR.

\* $P < 0.05$ , \*\* $P < 0.01$ , \*\*\* $P < 0.001$  compared with untreated T cells (-). P-values were determined by two-tailed one-way ANOVA with Dunnett's multiple-comparisons test.



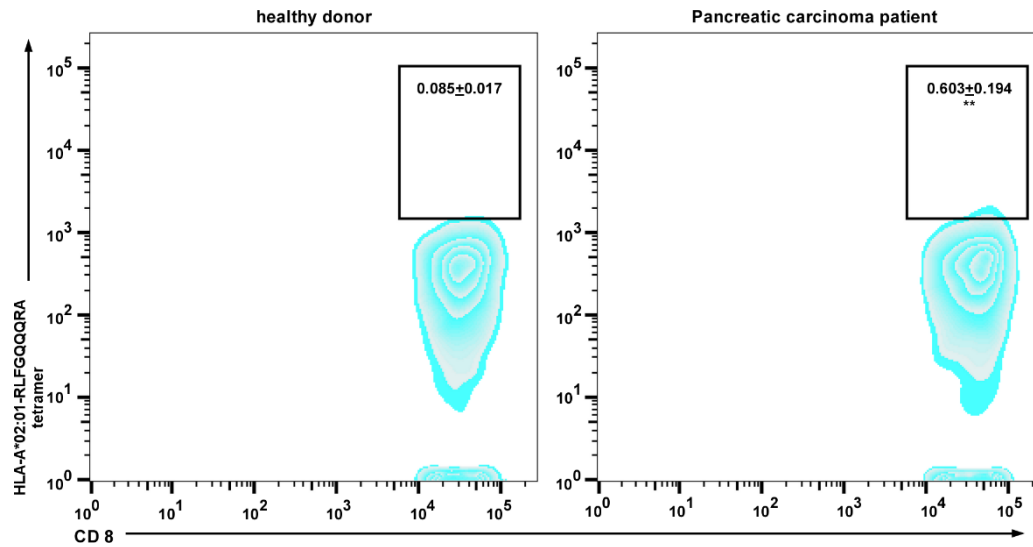

**Figure S11.** Representative flow cytometry plots and quantitation of RLFQQQRA-tetramer+ CTLs in the peripheral blood of healthy donor and pancreatic carcinoma patients with uPeptide of RNF10 expression (mean  $\pm$  s.d.; healthy donor: n = 3, patient: n = 3). \*P < 0.05, \*\*P < 0.01, \*\*\*P < 0.001, by t-test.

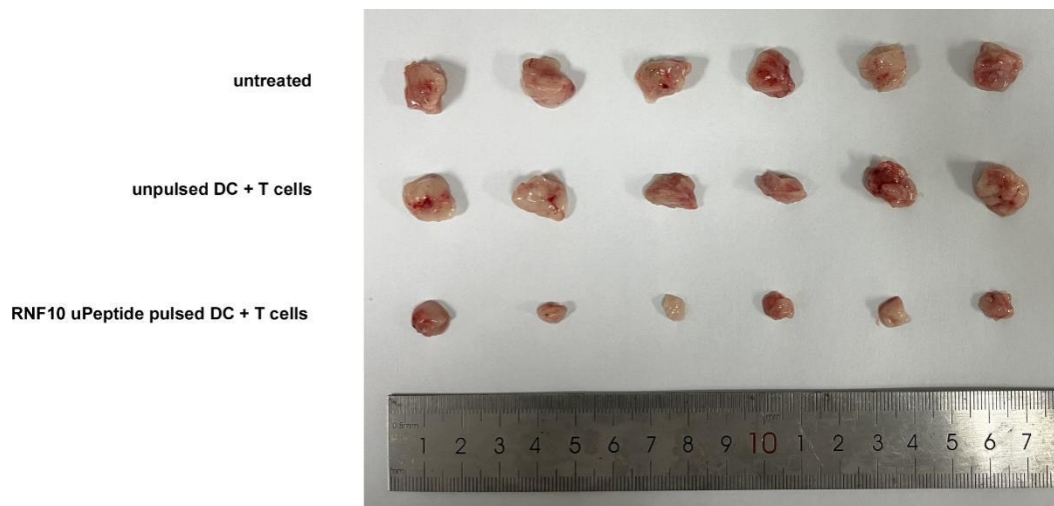

**Figure S12.** Images of PDX tumors in each group.
